# Supplementary material for: Differential trends in rising endometrial cancer incidence by age, race, and ethnicity
Source: PubMed Central journal article supplement — JNCI Cancer Spectr. 2023 Jan 10;7(1):pkad001. doi: 10.1093/jncics/pkad001 (PMC9904185; doi:10.1093/jncics/pkad001), 2023-01-10

## Supplementary Material

Supplementary Table 1. Histology codes included in the study to define subgroups of endometrial cancer study based on ICD-O-3, invasive behaviors only\*

| <b>Included Histology Codes</b> |                                                                                                                                                                                                                                                                                                                                                                                                                                                                                                                                                                                                                                                                                                                                                                                                                                                                                                                                                                                       |
|---------------------------------|---------------------------------------------------------------------------------------------------------------------------------------------------------------------------------------------------------------------------------------------------------------------------------------------------------------------------------------------------------------------------------------------------------------------------------------------------------------------------------------------------------------------------------------------------------------------------------------------------------------------------------------------------------------------------------------------------------------------------------------------------------------------------------------------------------------------------------------------------------------------------------------------------------------------------------------------------------------------------------------|
| Endometrioid                    | 8050/3: Papillary carcinoma, NOS<br>8141/3: Scirrhus adenocarcinoma<br>8210/3: Adenocarcinoma in adenomatous polyp<br>8211/3: Tubular adenocarcinoma<br>8260/3: Papillary adenocarcinoma, NOS<br>8261/3: Adenocarcinoma in villous adenoma<br>8262/3: Villous adenocarcinoma<br>8263/3: Adenocarcinoma in tubulovillous adenoma<br>8380/3: Endometrioid carcinoma<br>8381/3: Endometrioid adenofibroma, malignant<br>8382/3: Endometrioid adenocarcinoma, secretory variant<br>8383/3: Endometrioid adenocarcinoma, ciliated cell variant<br>8440/3: Cystadenocarcinoma, NOS<br>8470/3: Mucinous cystadenocarcinoma, NOS<br>8471/3: Papillary mucinous cystadenocarcinoma<br>8480/3: Mucinous adenocarcinoma<br>8481/3: Mucin-producing adenocarcinoma<br>8490/3: Signet ring cell carcinoma<br>8560/3: Adenosquamous carcinoma<br>8570/3: Adenocarcinoma with squamous metaplasia<br>8571/3: Adenocarcinoma with cartilaginous and osseous metaplasia<br>8140/3: Adenocarcinoma, NOS |
| Nonendometrioid                 | 8255/3: Adenocarcinoma with mixed subtypes<br>8310/3: Clear cell adenocarcinoma, NOS<br>8323/3: Mixed cell adenocarcinoma<br>8441/3: Serous cystadenocarcinoma, NOS<br>8460/3: Papillary serous cystadenocarcinoma<br>8461/3: Serous surface papillary carcinoma<br>8950/3: Mullerian mixed tumor<br>8951/3: Mesodermal mixed tumor<br>8980/3: Carcinosarcoma, NOS<br>8981/3: Carcinosarcoma, embryonal                                                                                                                                                                                                                                                                                                                                                                                                                                                                                                                                                                               |
| Sarcomas                        | 8800/3: Sarcoma, NOS<br>8801/3: Spindle cell sarcoma<br>8802/3: Giant cell sarcoma<br>8803/3: Small cell sarcoma<br>8804/3: Epithelioid sarcoma<br>8805/3: Undifferentiated sarcoma<br>8810/3: Fibrosarcoma, NOS<br>8811/3: Fibromyxosarcoma<br>8814/3: Infantile fibrosarcoma<br>8840/3: Myxosarcoma                                                                                                                                                                                                                                                                                                                                                                                                                                                                                                                                                                                                                                                                                 |

|       |                                                                                                                                                                                                                                                                                                                                                                                                                                                                                                                                                                                                                                                                                                                                                                                                                                                                                                                                                                                                                    |
|-------|--------------------------------------------------------------------------------------------------------------------------------------------------------------------------------------------------------------------------------------------------------------------------------------------------------------------------------------------------------------------------------------------------------------------------------------------------------------------------------------------------------------------------------------------------------------------------------------------------------------------------------------------------------------------------------------------------------------------------------------------------------------------------------------------------------------------------------------------------------------------------------------------------------------------------------------------------------------------------------------------------------------------|
|       | <p>8850/3: Liposarcoma, NOS<br/> 8853/3: Round cell liposarcoma<br/> 8855/3: Mixed liposarcoma<br/> 8860/3: Angiomyoliposarcoma<br/> 8890/3: Leiomyosarcoma, NOS<br/> 8891/3: Epithelioid leiomyosarcoma<br/> 8895/3: Myosarcoma<br/> 8896/3: Myxoid leiomyosarcoma<br/> 8900/3: Rhabdomyosarcoma, NOS<br/> 8901/3: Pleomorphic rhabdomyosarcoma, adult type<br/> 8902/3: Mixed type rhabdomyosarcoma<br/> 8910/3: Embryonal rhabdomyosarcoma, NOS<br/> 8912/3: Spindle cell rhabdomyosarcoma<br/> 8920/3: Alveolar rhabdomyosarcoma<br/> 8930/3: Endometrial stromal sarcoma, NOS<br/> 8931/3: Endometrial stromal sarcoma, low grade<br/> 8933/3: Adenosarcoma<br/> 8935/3: Stromal sarcoma, NOS<br/> 8936/3: GI stromal sarcoma<br/> 9120/3: Hemangiosarcoma<br/> 9180/3: Osteosarcoma, NOS<br/> 9220/3: Chondrosarcoma, NOS<br/> 9240/3: Mesenchymal chondrosarcoma<br/> 9260/3: Ewing sarcoma</p>                                                                                                             |
| Other | <p>8000/3: Neoplasm, malignant<br/> 8001/3: Tumor cells, malignant<br/> 8004/3: Malignant tumor, spindle cell type<br/> 8005/3: Malignant tumor, clear cell type<br/> 8010/3: Carcinoma, NOS<br/> 8011/3: Epithelioma, malignant<br/> 8012/3: Large cell carcinoma, NOS<br/> 8013/3: Large cell neuroendocrine carcinoma<br/> 8014/3: Large cell carcinoma with rhabdoid phenotype<br/> 8015/3: Glassy cell carcinoma<br/> 8020/3: Carcinoma, undifferentiated, NOS<br/> 8021/3: Carcinoma, anaplastic type, NOS<br/> 8022/3: Pleiomorphic carcinoma<br/> 8030/3: Giant cell and spindle cell carcinoma<br/> 8031/3: Giant cell carcinoma<br/> 8032/3: Spindle cell carcinoma<br/> 8033/3: Pseudosarcomatous carcinoma<br/> 8040/3: Tumorlet, malignant<br/> 8041/3: Small cell carcinoma, NOS<br/> 8045/3: Combined small cell carcinoma<br/> 8046/3: Non-small cell carcinoma<br/> 8051/3: Verrucous carcinoma, NOS<br/> 8052/3: Papillary squamous cell carcinoma<br/> 8070/3: Squamous cell carcinoma, NOS</p> |

|                                                                                                                                                                                                                                                                                                                                                                                                                                                                                                                                                                                                                                                                                                                                                                                                                                                                                                                                                                                                                                                                                                                                                                                                                                                                                                                                                                                                                                                                                                                                                                                                                                                                                                                                                                                                                                                                                                                                                                                                                                                                                                                                                                                                                                      |
|--------------------------------------------------------------------------------------------------------------------------------------------------------------------------------------------------------------------------------------------------------------------------------------------------------------------------------------------------------------------------------------------------------------------------------------------------------------------------------------------------------------------------------------------------------------------------------------------------------------------------------------------------------------------------------------------------------------------------------------------------------------------------------------------------------------------------------------------------------------------------------------------------------------------------------------------------------------------------------------------------------------------------------------------------------------------------------------------------------------------------------------------------------------------------------------------------------------------------------------------------------------------------------------------------------------------------------------------------------------------------------------------------------------------------------------------------------------------------------------------------------------------------------------------------------------------------------------------------------------------------------------------------------------------------------------------------------------------------------------------------------------------------------------------------------------------------------------------------------------------------------------------------------------------------------------------------------------------------------------------------------------------------------------------------------------------------------------------------------------------------------------------------------------------------------------------------------------------------------------|
| <p>8071/3: Squamous cell carcinoma, keratinizing, NOS<br/> 8072/3: Squamous cell ca., large cell, nonkeratinizing<br/> 8073/3: Squamous cell ca., small cell, nonkeratinizing<br/> 8074/3: Squamous cell carcinoma, spindle cell<br/> 8076/3: Squamous cell carcinoma, microinvasive<br/> 8082/3: Lymphoepithelial carcinoma<br/> 8083/3: Basaloid squamous cell carcinoma<br/> 8084/3: Squamous cell carcinoma, clear cell type<br/> 8098/3: Adenoid basal cell carcinoma<br/> 8120/3: Transitional cell carcinoma, NOS<br/> 8130/3: Papillary transitional cell carcinoma<br/> 8144/3: Adenocarcinoma, intestinal type<br/> 8200/3: Adenoid cystic carcinoma<br/> 8201/3: Cribriform carcinoma, NOS<br/> 8220/3: Adenocarcinoma in adenomatous polyposis coli<br/> 8221/3: Adenocarcinoma in mult. adenomatous polyposis coli<br/> 8230/3: Solid carcinoma, NOS<br/> 8244/3: Composite carcinoid<br/> 8246/3: Neuroendocrine carcinoma<br/> 8249/3: Atypical carcinoid tumor<br/> 8290/3: Oxyphilic adenocarcinoma<br/> 8313/3: Clear cell adenocarcinofibroma<br/> 8320/3: Granular cell carcinoma<br/> 8370/3: Adrenal cortical carcinoma<br/> 8384/3: Adenocarcinoma, endocervical type<br/> 8410/3: Sebaceous adenocarcinoma<br/> 8450/3: Papillary cystadenocarcinoma, NOS<br/> 8482/3: Mucinous adenocarcinoma, endocervical type<br/> 8507/3: Ductal carcinoma, micropapillary<br/> 8510/3: Medullary carcinoma, NOS<br/> 8562/3: Epithelial-myoepithelial carcinoma<br/> 8574/3: Adenocarcinoma with neuroendocrine differentiation<br/> 8575/3: Metaplastic carcinoma, NOS<br/> 8576/3: Hepatoid adenocarcinoma<br/> 8580/3: Thymoma, malignant, NOS<br/> 8590/3: Sex cord-gonadal stromal tumor, malignant, NOS<br/> 8620/3: Granulosa cell tumor, malignant<br/> 8806/3: Desmoplastic small round cell tumor<br/> 8825/3: Myofibroblastoma, malignant<br/> 8830/3: Fibrous histiocytoma, malignant<br/> 8897/3: Malignant tumor of smooth muscle<br/> 8934/3: Carcinofibroma<br/> 8940/3: Mixed tumor, malignant, NOS<br/> 8960/3: Nephroblastoma, NOS<br/> 8963/3: Malignant rhabdoid tumor<br/> 8990/3: Mesenchymoma, malignant<br/> 9014/3: Serous adenocarcinofibroma<br/> 9015/3: Mucinous adenocarcinofibroma</p> |
|--------------------------------------------------------------------------------------------------------------------------------------------------------------------------------------------------------------------------------------------------------------------------------------------------------------------------------------------------------------------------------------------------------------------------------------------------------------------------------------------------------------------------------------------------------------------------------------------------------------------------------------------------------------------------------------------------------------------------------------------------------------------------------------------------------------------------------------------------------------------------------------------------------------------------------------------------------------------------------------------------------------------------------------------------------------------------------------------------------------------------------------------------------------------------------------------------------------------------------------------------------------------------------------------------------------------------------------------------------------------------------------------------------------------------------------------------------------------------------------------------------------------------------------------------------------------------------------------------------------------------------------------------------------------------------------------------------------------------------------------------------------------------------------------------------------------------------------------------------------------------------------------------------------------------------------------------------------------------------------------------------------------------------------------------------------------------------------------------------------------------------------------------------------------------------------------------------------------------------------|

|  |                                                                                                                                                                                                                                                                                                                                                                                                                                                                                                                                                                                                                                                                                                                                |
|--|--------------------------------------------------------------------------------------------------------------------------------------------------------------------------------------------------------------------------------------------------------------------------------------------------------------------------------------------------------------------------------------------------------------------------------------------------------------------------------------------------------------------------------------------------------------------------------------------------------------------------------------------------------------------------------------------------------------------------------|
|  | 9065/3: Germ cell tumor, nonseminomatous<br>9071/3: Yolk sac tumor<br>9080/3: Teratoma, malignant, NOS<br>9085/3: Mixed germ cell tumor<br>9100/3: Choriocarcinoma, NOS<br>9101/3: Choriocarcinoma combined with other germ cell elements<br>9104/3: Malignant placental site trophoblastic tumor<br>9105/3: Trophoblastic tumor, epithelioid<br>9110/3: Mesonephroma, malignant<br>9130/3: Hemangioendothelioma, malignant<br>9150/3: Hemangiopericytoma, malignant<br>9251/3: Malignant giant cell tumor of soft parts<br>9364/3: Peripheral neuroectodermal tumor<br>9380/3: Glioma, malignant<br>9473/3: Primitive neuroectodermal tumor<br>9508/3: Atypical teratoid/rhabdoid tumor<br>9581/3: Alveolar soft part sarcoma |
|--|--------------------------------------------------------------------------------------------------------------------------------------------------------------------------------------------------------------------------------------------------------------------------------------------------------------------------------------------------------------------------------------------------------------------------------------------------------------------------------------------------------------------------------------------------------------------------------------------------------------------------------------------------------------------------------------------------------------------------------|

\* We utilized clinically relevant ICD-0-3 codes which have been consistently used across published literature of endometrial cancer trend studies to ensure our data are comparable.<sup>23,24</sup> Histology codes 9050-9055 (mesothelioma), 9140 (Kaposi sarcoma), and 9590-9992 (Hodgkin and non-Hodgkin lymphomas, plasma cell tumors, mast cell tumors, neoplasms of histiocytes and accessory lymphoid cells, immunoproliferative diseases, leukemias, chronic myeloproliferative disorders, other hematologic disorders, myelodysplastic syndromes) are excluded, according to SEER Site Recode.<sup>13</sup>

Supplementary Table 2. Annual Age-Adjusted Incidence Rates (AAIRs per 100,000) by Race/Ethnicity for Early-Onset Endometrial Cancer (EOEC) and Late-Onset Endometrial (LOEC), 1995-2018, United States

| EOEC (Age <50)  |           |          |                           |          |          |  |
|-----------------|-----------|----------|---------------------------|----------|----------|--|
|                 | All Races | Hispanic | NH Asian/Pacific Islander | NH Black | NH White |  |
| 1995            | 4.1       | 4.2      | 4.4                       | 2.3      | 4.2      |  |
| 1996            | 4.1       | 3.8      | 4.5                       | 2.2      | 4.4      |  |
| 1997            | 4.1       | 3.5      | 3.9                       | 2.3      | 4.4      |  |
| 1998            | 4.2       | 3.7      | 3.8                       | 2.2      | 4.6      |  |
| 1999            | 4.2       | 4.0      | 4.2                       | 2.2      | 4.5      |  |
| 2000            | 4.5       | 4.4      | 4.6                       | 2.3      | 4.8      |  |
| 2001            | 4.6       | 4.5      | 4.7                       | 2.8      | 4.8      |  |
| 2002            | 4.6       | 4.4      | 4.8                       | 2.9      | 4.8      |  |
| 2003            | 4.5       | 4.2      | 4.7                       | 2.4      | 4.8      |  |
| 2004            | 4.7       | 4.6      | 5.3                       | 2.8      | 5.0      |  |
| 2005            | 4.7       | 4.8      | 5.0                       | 2.6      | 5.0      |  |
| 2006            | 4.9       | 5.0      | 4.5                       | 3.0      | 5.3      |  |
| 2007            | 4.9       | 4.8      | 4.9                       | 2.8      | 5.1      |  |
| 2008            | 5.0       | 5.0      | 5.1                       | 3.2      | 5.3      |  |
| 2009            | 5.2       | 5.4      | 5.5                       | 3.5      | 5.3      |  |
| 2010            | 5.2       | 5.1      | 5.3                       | 3.2      | 5.4      |  |
| 2011            | 5.3       | 5.5      | 5.3                       | 3.6      | 5.4      |  |
| 2012            | 5.3       | 5.7      | 5.6                       | 3.6      | 5.4      |  |
| 2013            | 5.3       | 5.8      | 6.0                       | 3.6      | 5.3      |  |
| 2014            | 5.8       | 6.3      | 5.7                       | 4.1      | 5.8      |  |
| 2015            | 6.0       | 6.3      | 6.1                       | 4.5      | 6.1      |  |
| 2016            | 6.0       | 7.0      | 5.8                       | 4.1      | 6.0      |  |
| 2017            | 5.9       | 6.4      | 6.3                       | 4.3      | 5.9      |  |
| 2018            | 6.0       | 6.9      | 6.9                       | 3.9      | 5.8      |  |
| LOEC (Age ≥ 50) |           |          |                           |          |          |  |
|                 | All Races | Hispanic | NH Asian/Pacific Islander | NH Black | NH White |  |
| 1995            | 65.8      | 46.5     | 33.6                      | 48.7     | 70.3     |  |
| 1996            | 68.3      | 45.4     | 35.6                      | 53.2     | 72.9     |  |
| 1997            | 67.7      | 46.7     | 33.0                      | 51.8     | 72.2     |  |
| 1998            | 67.7      | 48.9     | 36.8                      | 53.3     | 71.8     |  |
| 1999            | 67.1      | 46.4     | 37.8                      | 52.8     | 71.3     |  |
| 2000            | 65.6      | 49.3     | 33.1                      | 53.0     | 69.6     |  |
| 2001            | 67.4      | 47.9     | 35.7                      | 54.7     | 71.6     |  |
| 2002            | 66.3      | 50.2     | 36.5                      | 55.3     | 69.9     |  |
| 2003            | 64.2      | 48.2     | 37.1                      | 56.4     | 67.4     |  |
| 2004            | 64.5      | 51.1     | 39.2                      | 57.2     | 67.5     |  |
| 2005            | 65.4      | 49.4     | 39.0                      | 57.9     | 68.8     |  |
| 2006            | 65.7      | 49.9     | 40.2                      | 59.7     | 69.1     |  |
| 2007            | 66.9      | 49.6     | 43.9                      | 61.6     | 70.2     |  |
| 2008            | 68.2      | 52.6     | 41.6                      | 64.6     | 71.6     |  |
| 2009            | 70.0      | 53.3     | 45.7                      | 67.0     | 73.3     |  |
| 2010            | 70.6      | 54.0     | 47.4                      | 66.7     | 74.1     |  |
| 2011            | 71.6      | 57.9     | 45.9                      | 70.3     | 74.6     |  |
| 2012            | 72.7      | 57.9     | 46.6                      | 71.1     | 76.0     |  |
| 2013            | 73.1      | 60.3     | 49.6                      | 70.7     | 76.1     |  |
| 2014            | 74.0      | 60.7     | 49.2                      | 75.2     | 76.7     |  |
| 2015            | 75.0      | 62.9     | 51.5                      | 75.1     | 77.6     |  |
| 2016            | 77.2      | 65.0     | 51.8                      | 77.4     | 80.0     |  |
| 2017            | 76.6      | 62.4     | 55.4                      | 78.7     | 79.0     |  |
| 2018            | 76.7      | 64.8     | 56.2                      | 81.4     | 78.3     |  |

NH=Non-Hispanic.

Supplementary Table 3. Average Annual Percent Change (AAPC) in Race/Ethnic-Specific Age-Adjusted Incidence Rates (AAIRs) with 95% Confidence Interval (CI) and P-Value for Trend Significance, Early-Onset Endometrial Cancer (EOEC) and Late-Onset Endometrial Cancer (LOEC), 1995-2018, United States

|                           | EOEC (Age <50) |           |         | LOEC (Age ≥ 50) |           |         |
|---------------------------|----------------|-----------|---------|-----------------|-----------|---------|
|                           | AAPC           | 95% CI    | P-Value | AAPC            | 95% CI    | P-Value |
| All Races                 | 1.8            | 1.7 - 2.0 | <0.001  | 0.7             | 0.5 - 0.9 | <0.001  |
| Hispanic                  | 2.8            | 2.5 - 3.1 | <0.001  | 1.7             | 1.5 - 1.9 | <0.001  |
| NH Asian/Pacific Islander | 2.1            | 1.7 - 2.4 | <0.001  | 2.4             | 2.2 - 2.7 | <0.001  |
| NH Black                  | 3.5            | 3.0 - 4.0 | <0.001  | 2.3             | 2.1 - 2.4 | <0.001  |
| NH White                  | 1.4            | 1.3 - 1.6 | <0.001  | 0.6             | 0.4 - 0.8 | <0.001  |

NH=Non-Hispanic.

Supplementary Figure 1. Consort Diagram of Case Selection

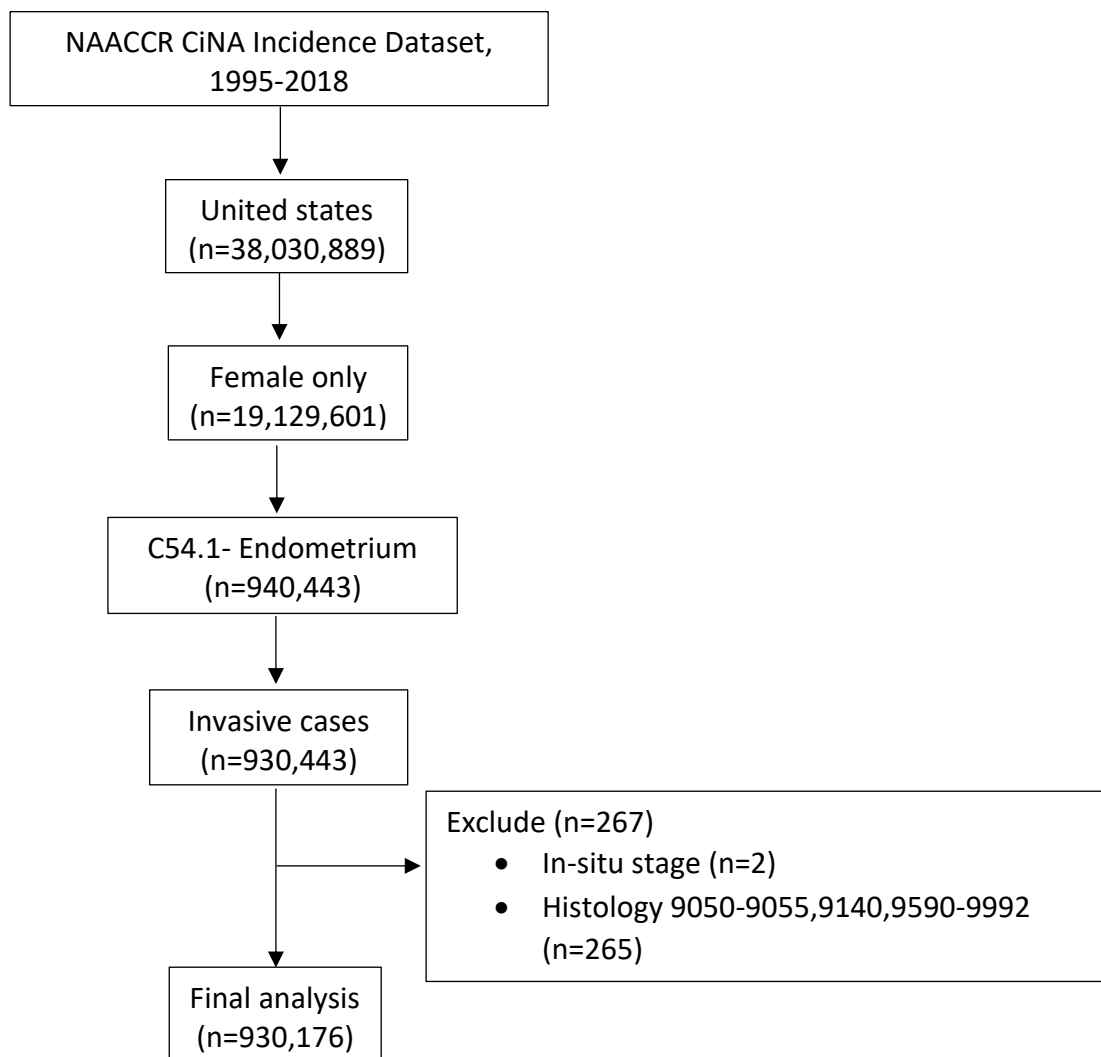

Supplement: pkad001_supplementary_data.pdf [file pkad001_supplementary_data.pdf]
